# Supplementary material
Source: JCI journal article supplement (doi:10.1172/jci.insight.203438)

# Gapdh fig.4

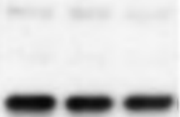

CD45

Fig.4

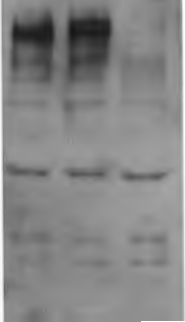

CD45

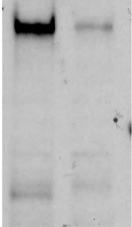

fig. 5

Gapdh

fig.5

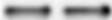

\* COL5

Fig.10A

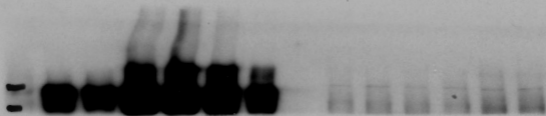

plyn 507 \*  
↓

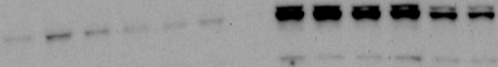

Fig.10A

tLyn \* ↓

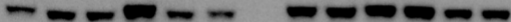

Fig.10A

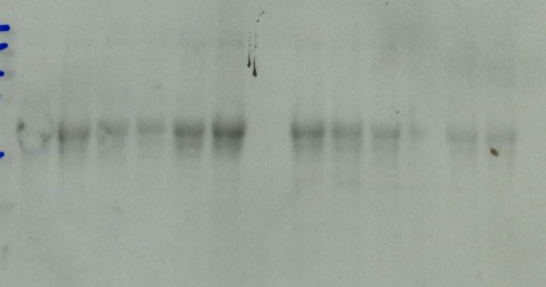

pFgr512

Fig.10A

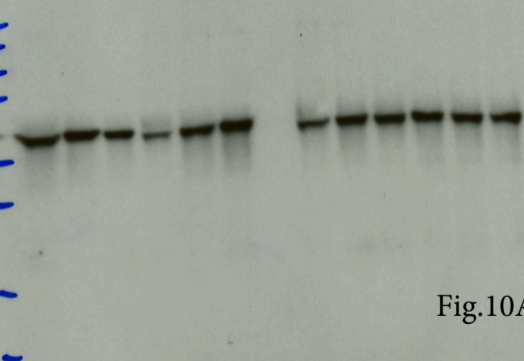

Fig.10A

Hck 521 ↓

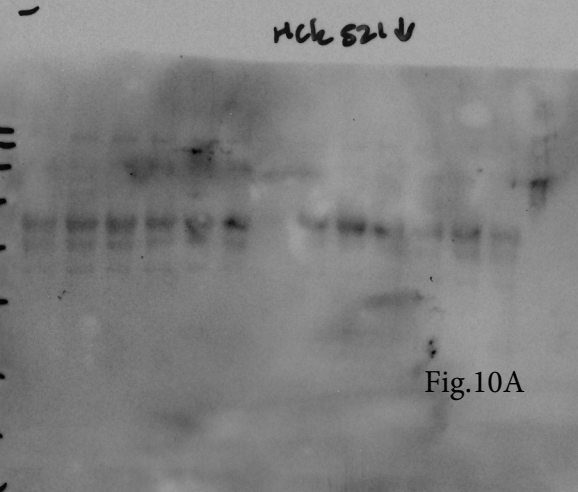

Fig.10A

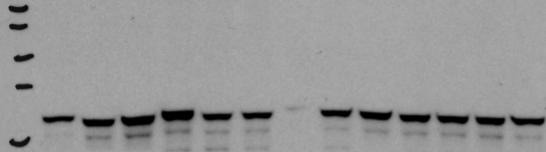

tHck

Fig.10A

Grap dh ↓

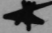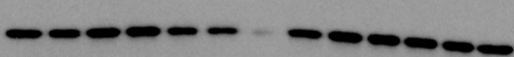

Fig.10A

CDUS

A

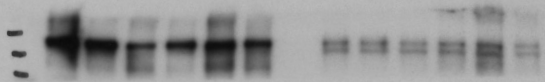

Fig.10C

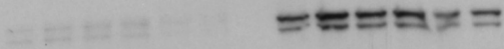

pLyn507

Fig.10C

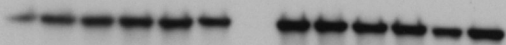

tLyn

Fig.10C

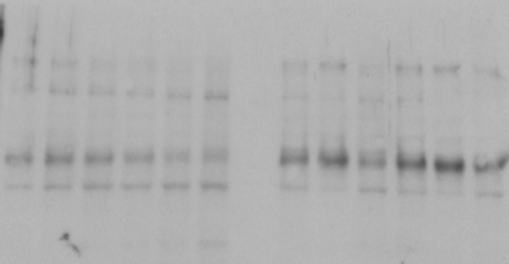

pHck521

Fig.10C

Fig.10C

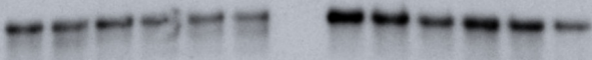

tHck

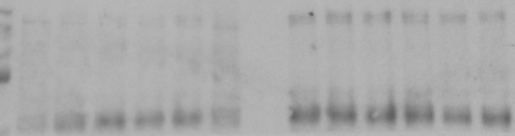

pFgr412

Fig.10C

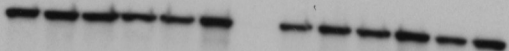

tFgr

Fig.10C

Gapdh

Fig.10C

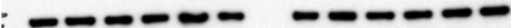

pFgr412 sup

Fig.9

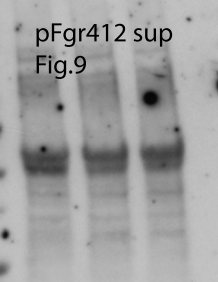

tFgr Sup Fig.9

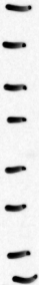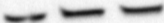

pHck521  
Sup. Fig.9

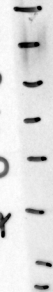

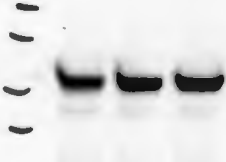

tHck Sup Fig.9

Gapdh

Sup. Fig.9

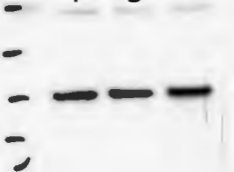

Supplement: sd1 [file 1]
